# Supplementary material for: Hydrogen saturation stabilizes vacancy-induced ferromagnetic ordering in graphene
Source: Royal Society of Chemistry journal article supplement (doi:10.1039/c003524f), 2010-01-01
Supplement: c003524f.pdf [file c003524f.pdf]

## Supporting Information

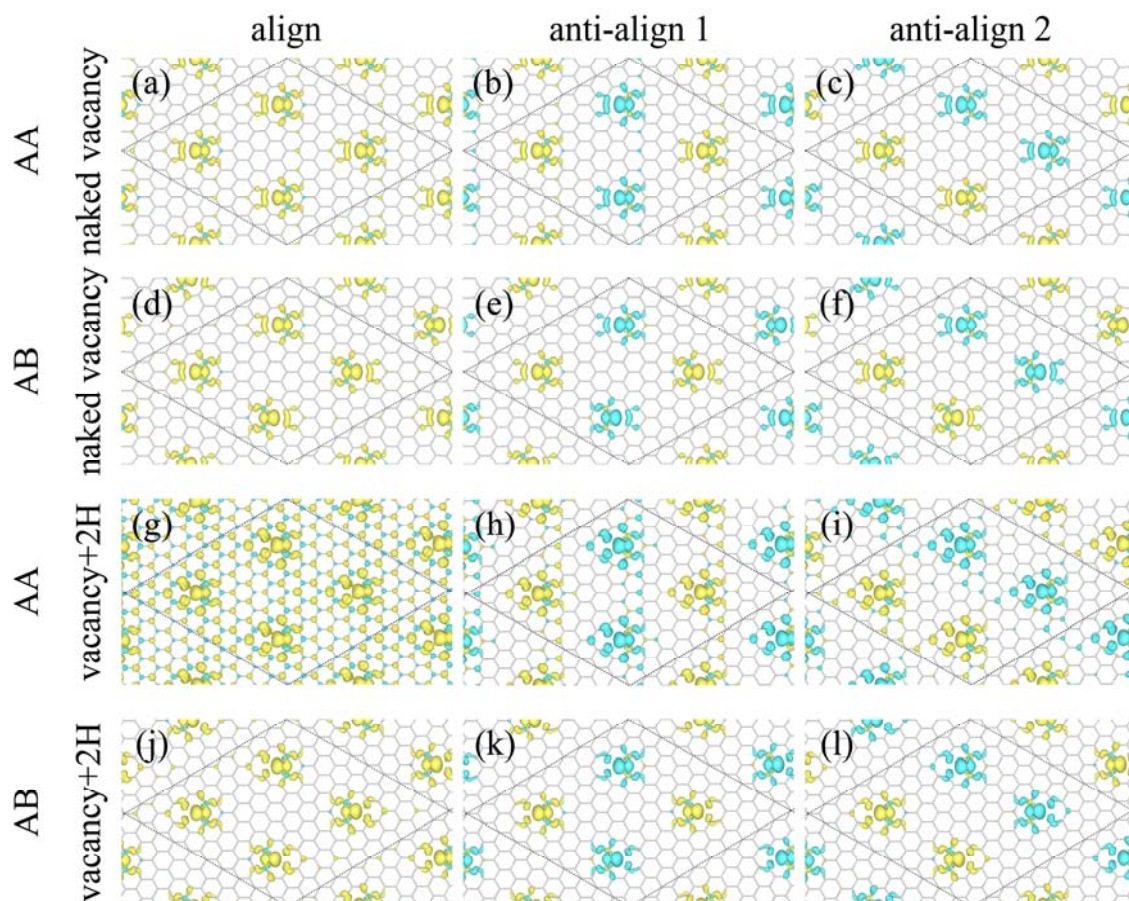

**Figure s1.** Spin density (isosurface= $0.002\mu_B/\text{\AA}^3$ ) of certain spin coupling configurations of (a)-(c) AA naked vacancy, (d)-(f) AB naked vacancy, (g)-(i) AA vacancy+2H (j)-(l) AB vacancy+2H. Vacancy distribution patterns are indicated on the left, while spin coupling configurations are labeled on the top. Yellow colored isosurface stands for spin up while cyan stands for spin down.

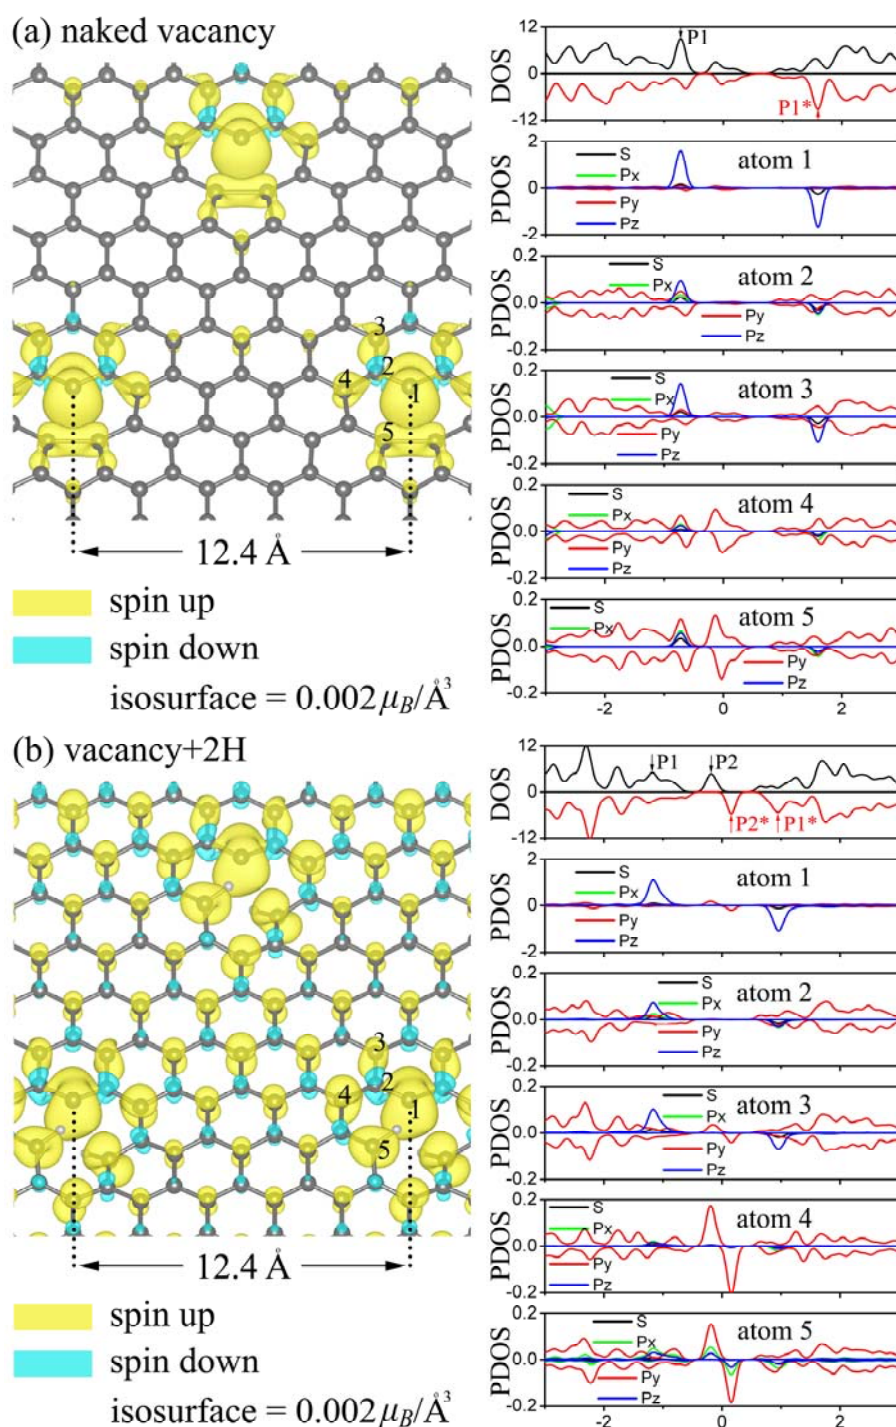

**Figure s2.** Spin density, DOS and projected DOS (gaussian smoothed) on atoms of AA patterned (a) naked vacancy and (b) vacancy+2H. Peaks labeled with P1, P2, P1\* and P2\* are discussed in the paper. Atomic serial number shown in the PDOS can be found in the right-bottom in the spin density figure.

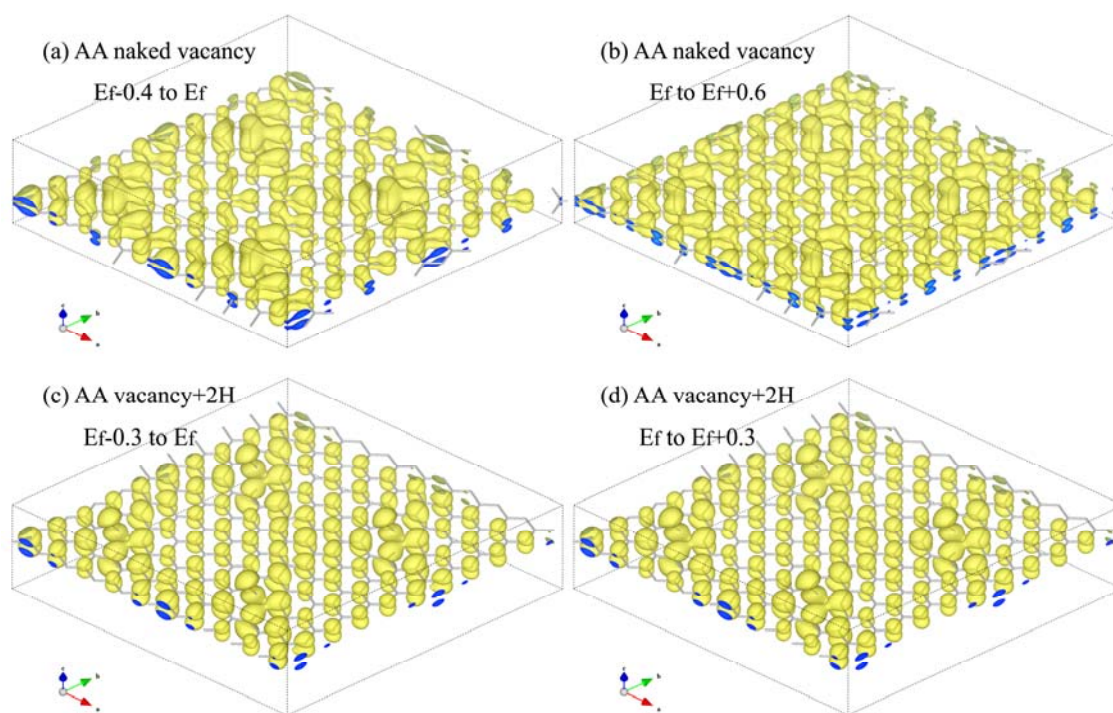

**Figure S3.** Partial charge density (spin up plus spin down, isosurface= $0.0004|e|/\text{\AA}^3$ ) of frontier orbital. The energy ranges that are used for the evaluation of the partial charge are corresponding to that in Fig. 5 in the paper.

For naked vacancy (Fig. S3a, S3b),  $P_z$  orbital of one A-site carbon overlaps efficiently with its B-site neighbor, so that  $\pi$  bond of a pristine graphene is highly reserved. On the contrary, for vacancy+2H, frontier electron is only localized at B-site carbons. The breaking of  $\pi$  bond makes these  $P_z$  electrons indiffusible so that the system is semiconductor.



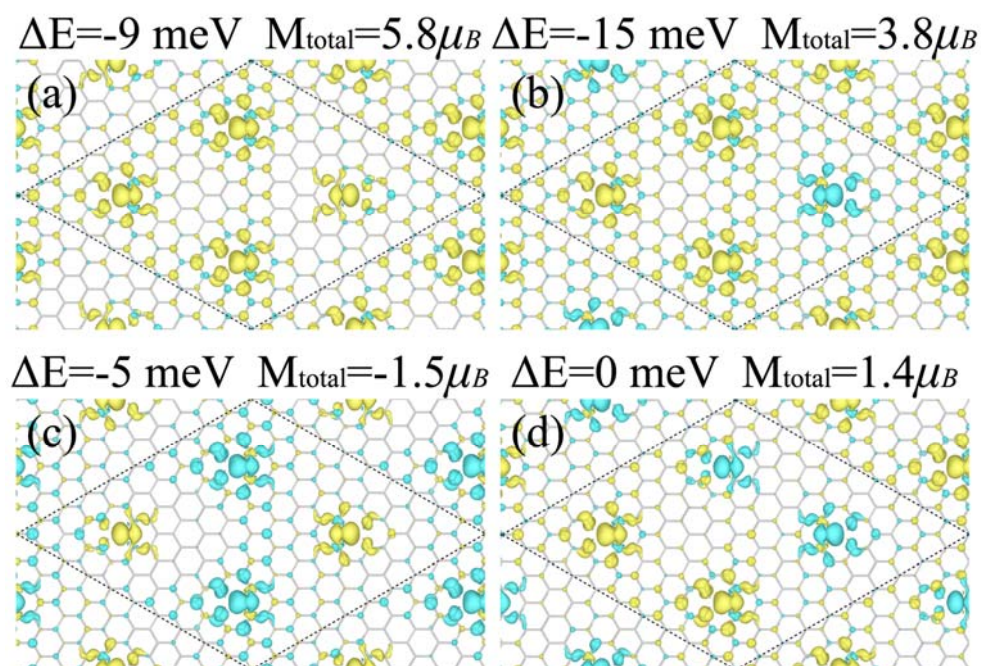

**Figure s4.** Spin density (isosurface= $0.002\mu_B/\text{\AA}^3$ ) of  $A_3B$  patterned vacancy+2H defects in a  $(10 \times 10)$  supercell: (a) align spin configuration, (b)  $3A_{\text{up}}B_{\text{down}}$  spin configuration, (c) anti-align 1 spin configuration and (d) anti-align 2 spin configuration. The relative energy per defect (taking anti-align 2 as reference state) and total magnetic moment of the supercell are labeled on the top. Yellow colored isosurface stands for spin up while cyan stands for spin down.
